# Supplementary material
Source: Springer Nature journal article supplement (https://www.springermedizin.de/resource/supplementary/12990_2009_195_MOESM5_ESM.pdf/9612764)

**A****SS**SNAP (100  $\mu$ M)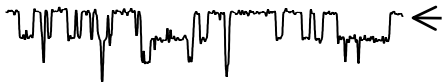ODQ (10  $\mu$ M) + SNAP (100  $\mu$ M)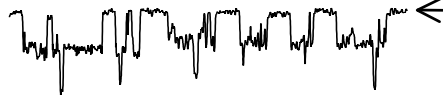KT 5823 (1  $\mu$ M) + SNAP (100  $\mu$ M)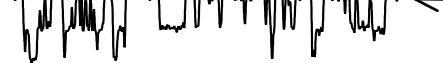**SNL**SNAP (100  $\mu$ M)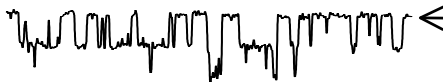ODQ (10  $\mu$ M) + SNAP (100  $\mu$ M)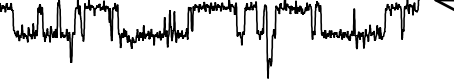KT 5823 (1  $\mu$ M) + SNAP (100  $\mu$ M)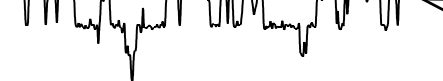

200 ms  
5 pA

**B****SS**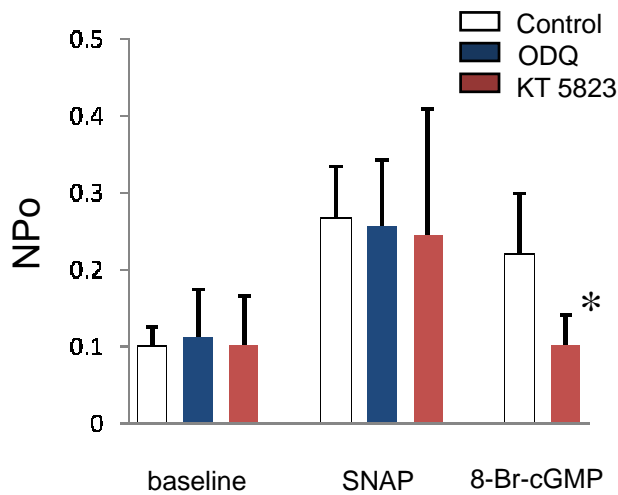**SNL**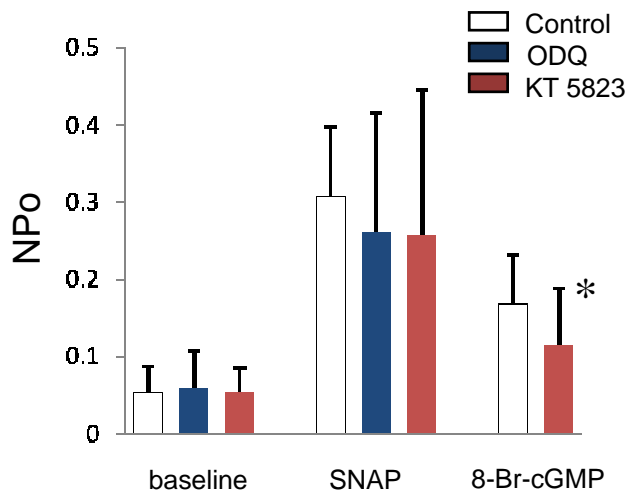

Supplement: MOESM5 [file 9612764]
